# Supplementary material for: Hypoxia-induced miR-424 decreases tumor sensitivity to chemotherapy by inhibiting apoptosis
Source: PubMed Central journal article supplement — Cell Death Dis. 2014 Jun 26;5(6):e1301–. doi: 10.1038/cddis.2014.240 (PMC4611715; doi:10.1038/cddis.2014.240), 2014-06-26
Supplement: cddis2014240x1.pdf [file cddis2014240x1.pdf]

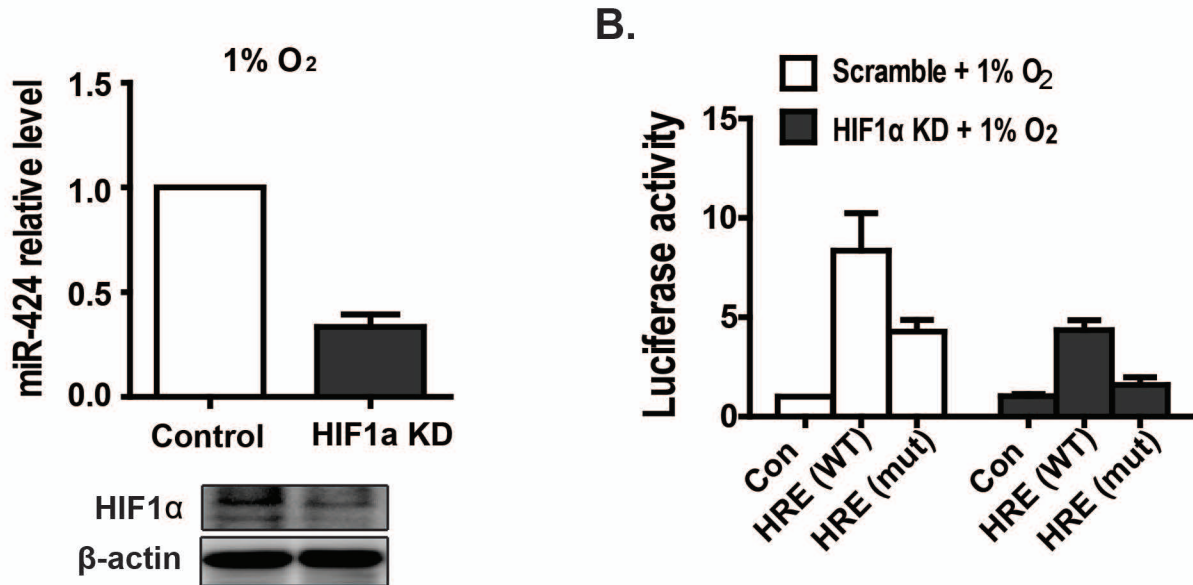

Figure S1 Hypoxia induced miR-424 expression in cancer cells. A. Knock down of HIF1 $\alpha$  decrease the expression of miR-424 in hypoxic condition. B. Knock down of HIF1 $\alpha$  significantly reduced wtHRE-dependent luciferase activity in hypoxic condition.

A.

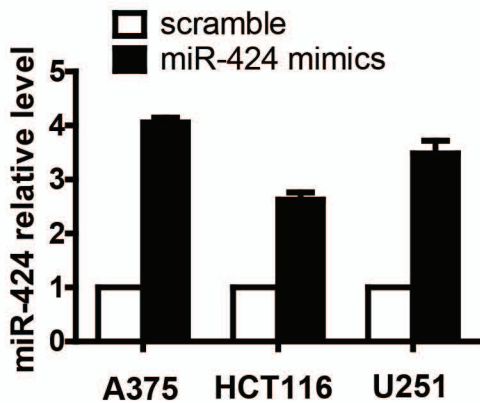

B.

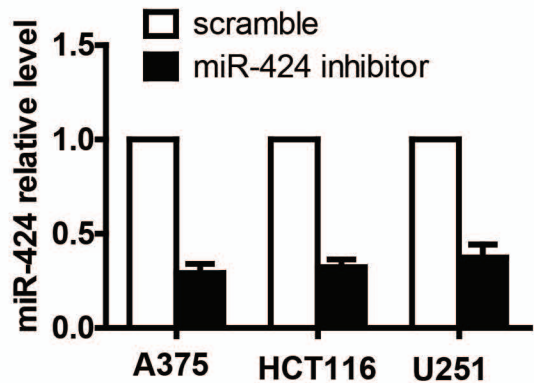

C.

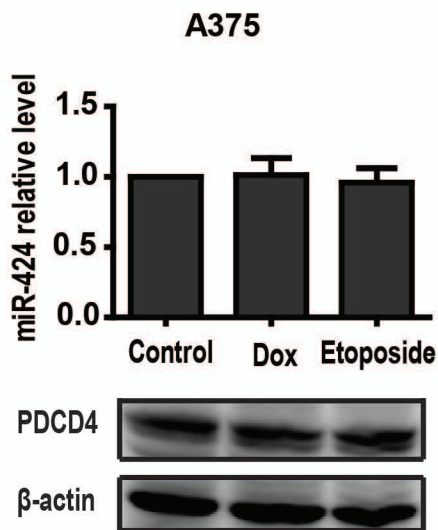

D.

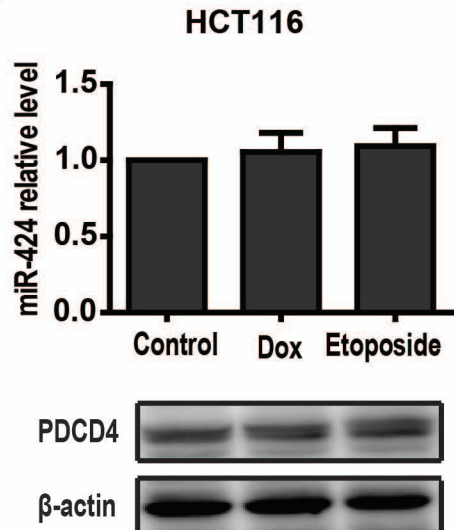

Figure S2 The overexpression of miR-424 suppresses the anti-cancer chemicals-induced apoptosis in tumor. A. The expression of miR-424 in A375, HCT116, U251 cells treated with miR-424 mimics were determined by qPCR. B. The expression of miR-424 in A375, HCT116, U251 cells treated with miR-424 inhibitor were also analyzed by qPCR. C. The expression of miR-424 in A375 cells treated with Dox or etoposide under normoxic condition. D. The expression of miR-424 in HCT116 cells treated with Dox or etoposide under normoxic condition.

A.

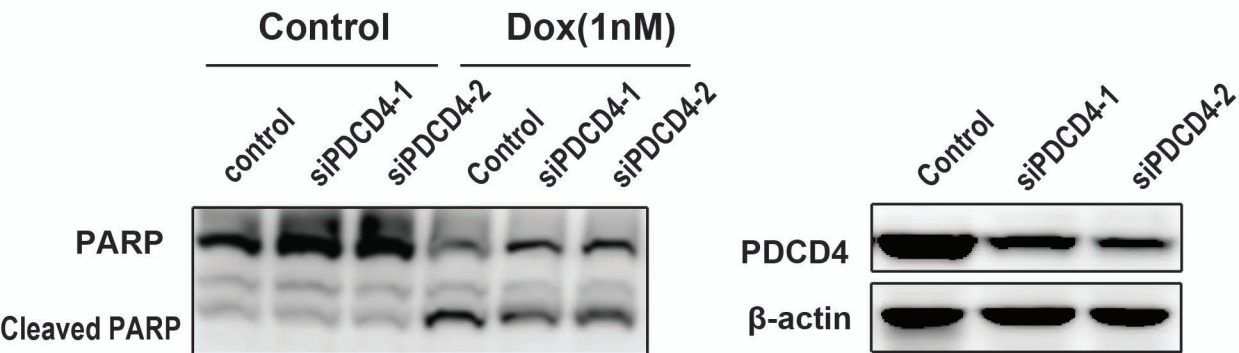

Figure S3 Downregulation of PDCD4 inhibited Dox-induced apoptosis.

A. Doxorubicin-induced PARP cleavage was decreased in PDCD4 knockdown cells, compared to control cells. The knockdown efficiency of PDCD4 was evaluated by Western blot.
